# Supplementary material for: Mutated TP53 in Circulating Tumor DNA as a Risk Level Biomarker in Head and Neck Squamous Cell Carcinoma Patients
Source: MDPI journal article supplement (doi:10.3390/biom13091418), 2023-09-20
Supplement: s1 [file s1]

## Supplementary

Table S1. List of primers used for TP53 amplification and M13/P1 primers

| <b>Primer Name</b> | <b>Sequence</b>          |
|--------------------|--------------------------|
| TP53ex2_F          | GATCCCCACTTTTCCTCTTG     |
| TP53ex2_R          | CTTCCACAGGTCTCTGCTA      |
| TP53ex3_F          | ACTGACTTTCTGCTCTTGTCTT   |
| TP53ex3_R          | GGACTGTAGATGGGTGAAAA     |
| TP53ex4a_F         | TGCTCTTTTCACCCATCTAC     |
| TP53ex4a_R         | AGGGACAGAAGATGACAGG      |
| TP53ex4b_F         | CACCAGCAGCTCCTACAC       |
| TP53ex4b_R         | GCATTGAAGTCTCATGGAAG     |
| TP53ex5start_F     | AGTTGCTTTATCTGTTCACCTTGT |
| TP53ex5start_R     | GTGCTGTGACTGCTTGTAGAT    |
| TP53ex6_F          | GATTCCTCACTGATTGCTCTT    |
| TP53ex6_R          | CACTGACAACCACCCTTAAC     |
| TP53ex9_F          | TTATGCCTCAGATTCACCTTTAT  |
| TP53ex9_R          | TTTGAGTGTTAGACTGGAACTT   |
| TP53ex10_F         | ATATACTTACTTCTCCCCCTCCT  |
| TP53ex10_R         | GATGAGAATGGAATCCTATGG    |
| TP53ex11_F         | CACTCATGTGATGTCATCTCTC   |
| TP53ex11_R         | GGGAACAAGAAGTGGAGAA      |
| TP53ex5_F          | CAGCTGTGGGTTGATTCC       |
| TP53ex5_R          | AGACCTAAGAGCAATCAGTGAG   |
| TP53ex7_F          | ATCTTGGGCCTGTGTTATC      |
| TP53ex7_R          | GGTCAGAGGCAAGCAGAG       |
| TP53ex8_F          | TTGCTTCTCTTTTCCTATCCT    |
| TP53ex8_R          | ATAACTGCACCCTTGGTCTC     |
| M13                | TGTAACGACGGCCAGT         |
| P1                 | CCTCTCTATGGGCAGTCG       |

**Table S2. List of primers designed to target patient specific TP53 mutation**

| <b>Primer Name</b> | <b>Sequence</b>           |
|--------------------|---------------------------|
| TP53_266to82_F     | CCTGAGTAGTGGTAATCTACTGG   |
| TP53_266to82_R     | GAGATTCTCTTCCTCTGTGC      |
| TP53209_13_F       | AGTTGCAAACCAGACCTCAG      |
| TP53209_13_R       | GAAATTTGCGTGTGGAGTAT      |
| TP53_ex8end_F      | CGCTTCTTGTCTGCTTG         |
| TP53_ex8end_R      | GAGAATCTCCGCAAGAAAG       |
| TP53_R175H_F       | GCCATCTACAAGCAGTCACA      |
| TP53_R175H_R       | CTGCTCACCATCGCTATCTG      |
| TP53ex5spl4_F      | GACTTTCAACTCTGTCTCCTTC    |
| TP53ex5a_R         | TGTGGAATCAACCCACAG        |
| TP53_242to41F      | ACAACCTACATGTGTAACAGTTCC  |
| TP53_242to41R      | CCAGTGTGATGATGGTGAGG      |
| TP53_158_F         | GTGCTGTGACTGCTTGTAGAT     |
| TP53_158_R         | CAGCTGTGGGTTGATTCC        |
| TP53_35_F          | CTCTTTTCACCCATCTACAGTC    |
| TP53_35_R          | ACAGCATCAAATCATCCATT      |
| TP53_ex8end_F      | CGCTTCTTGTCTGCTTG         |
| TP53_ex8end_R      | GAGAATCTCCGCAAGAAAG       |
| TP53_195_F         | ATTCCTCACTGATTGCTCTTAG    |
| TP53_195_R         | AAGTGTTTCTGTCATCCAAATAC   |
| TP53_242F          | ACAACCTACATGTGTAACAGTTCCT |
| TP53_257R          | CTCCTGACCTGGAGTCTTC       |
| TP53_224F          | ACTTTTCGACATAGTGTGGTG     |
| TP53_224R          | CTGACAACCACCCTTAACC       |
| TP53_237_F         | CTGGAGTCTTCCAGTGTGAT      |
| TP53_237_R         | GTACCACCATCCACTACAACCT    |

A

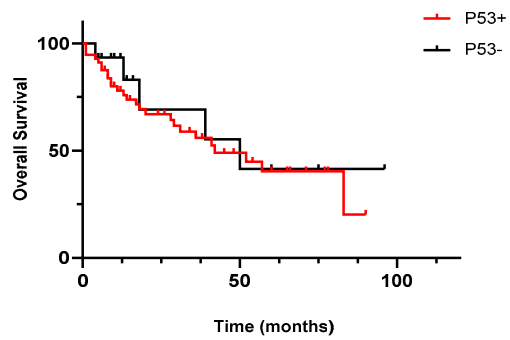

B

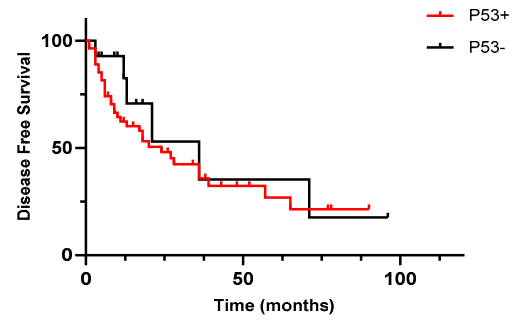

**Figure S1. Survival outcomes stratified by the presence of TP53 mutation in tumor DNA.** Kaplan Meier survival estimates of overall survival (A) and disease free survival (B) of the entire cohort (N=70) demonstrating no difference in clinical outcomes based on the presence of TP53 mutations.
